# Supplementary material for: Poly(N-isopropylacrylamide) hydrogels fabricated via click chemistry: well-defined α,ω-bis propargyl linear poly(N-isopropylacrylamide)s as crosslinkers
Source: Royal Society of Chemistry journal article supplement (doi:10.1039/c4ra07987f), 2014-01-01
Supplement: c4ra07987f1.pdf [file c4ra07987f1.pdf]

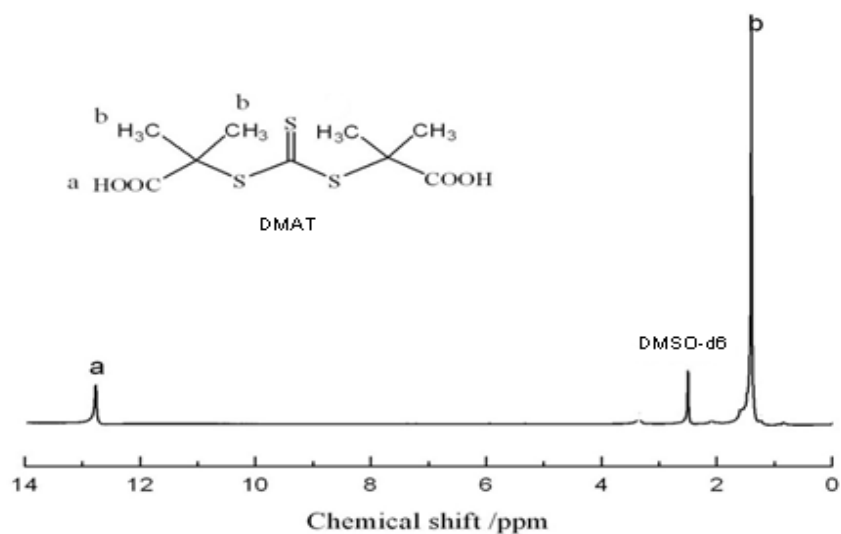

Fig. S1 <sup>1</sup>H-NMR spectrum of DMAT

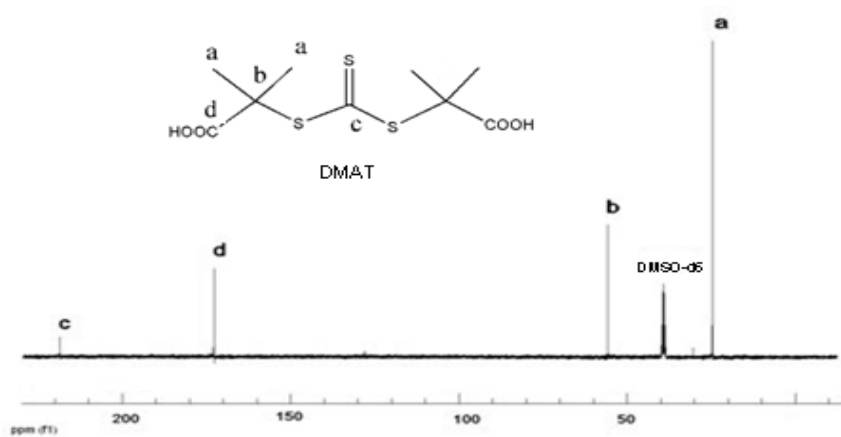

Fig. S2 <sup>13</sup>C-NMR spectrum of DMAT

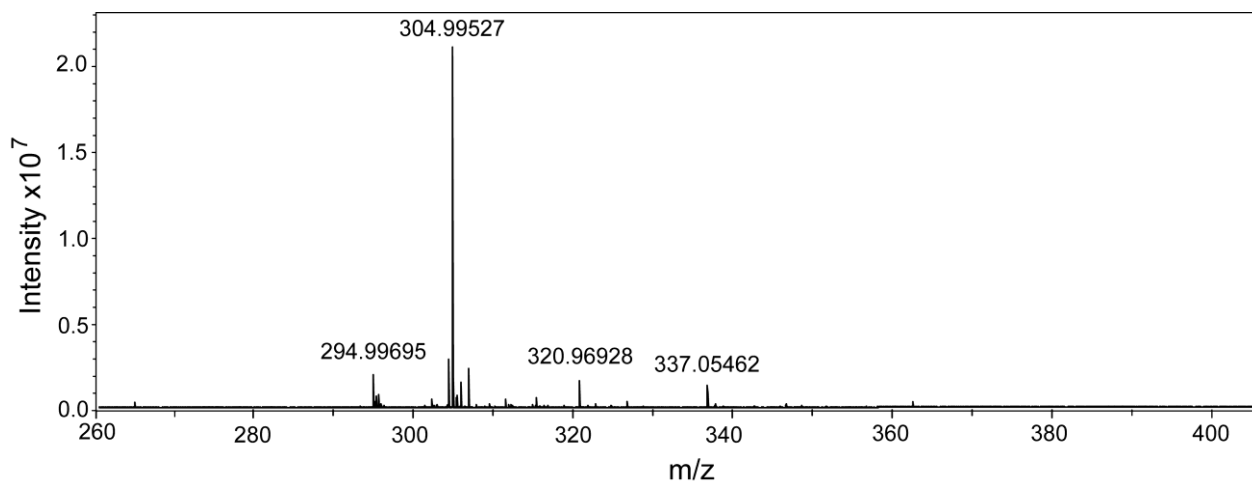

Fig. S3 HR-MS spectrum of DMAT

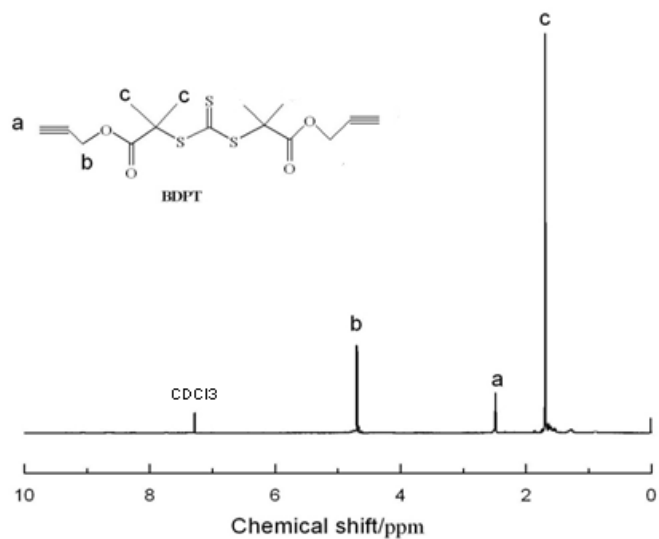

Fig. S4  $^1\text{H-NMR}$  spectrum of BDPT

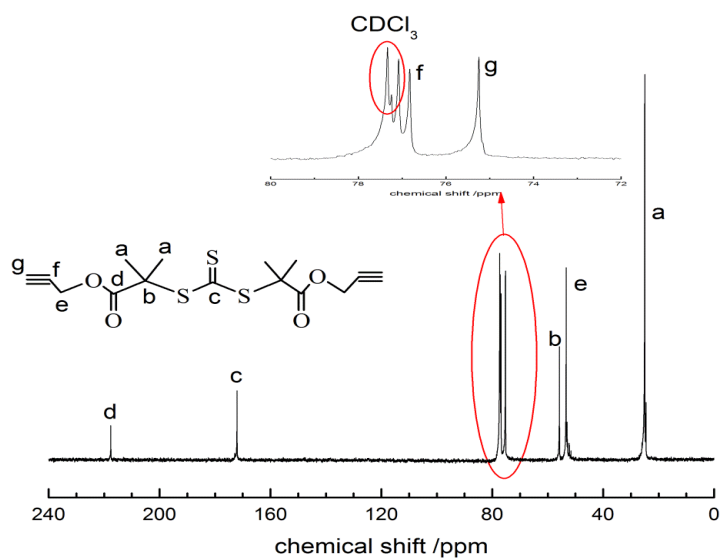

Fig. S5  $^{13}\text{C-NMR}$  spectrum of BDPT

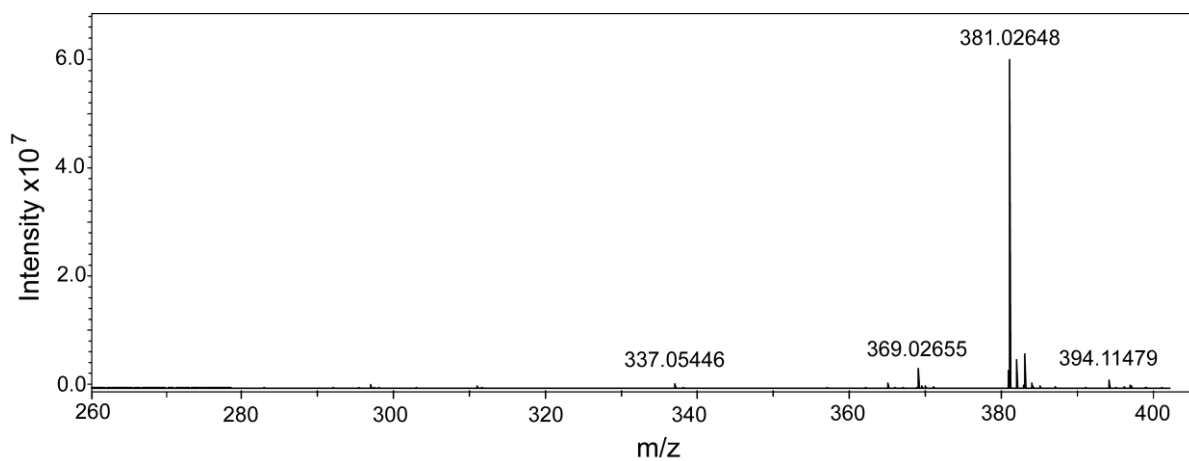

Fig. S6 HR-MS spectrum of BDPT
